# Supplementary material for: Thiourea-functionalized poly(phenyleneethynylene): fluorescent chemosensors for anions and cations
Source: Royal Society of Chemistry journal article supplement (doi:10.1039/c3py00359k), 2013-01-01
Supplement: c3py00359k.pdf [file c3py00359k.pdf]

## Thiourea-Functionalized Poly(phenyleneethynylene): Fluorescent Chemosensors for Anions and Cations

Xue Yong, Wen Wan, Mingjian Su, Wenwei You, Xinwei Lu, Yichen Yan, Jinqing Qu, Ruiyuan Liu, Toshio Masuda

### Contents

**Figure S1.**  $^1\text{H}$  NMR spectrum of **1** in  $\text{CDCl}_3$ .

**Figure S2.**  $^{13}\text{C}$  NMR spectrum of **1** in  $\text{CDCl}_3$ .

**Figure S3.** IR spectrum of **1**

**Figure S4.**  $^1\text{H}$ NMR spectrum of poly(**1**) in  $\text{DMSO}-d_6$ . \* indicates  $\text{H}_2\text{O}$ , \*\* indicates solvent.

**Figure S5.** IR spectrum of poly(**1**).

**Figure S6.** Relative intensity ( $I/I_0$ ) of fluorescence at 452 nm of poly(**1**) in DMF/water ([PRU] = 23.8  $\mu\text{M}$ ). Excitation at 380 nm.

**Figure S7.** UV-vis spectra of poly(**1**) in DMF/ $\text{H}_2\text{O}$  (99:1 v/v) ([PRU] = 23.8  $\mu\text{M}$ ) upon titration with  $\text{F}^-$  (0–50 equivalents).

**Figure S8.** Stern-Volmer plots of poly(**1**) emission quenching by different anions in DMF.

**Figure S9.** Schematic map of the interaction between poly(**1**) and fluoride ion.

**Figure S10.** Relative energy alignments about PET between poly(**1**) and fluoride ion.

**Figure S11.** UV-vis spectra of poly(**1**) in DMF/ $\text{H}_2\text{O}$  (99:1 v/v) ([PRU] = 23.8  $\mu\text{M}$ ) upon titration with  $\text{Ag}^+$  (0–10 equivalents).

**Figure S12.** Schematic map of the interaction between poly(**1**) and silver ion.

**Figure S13.** Relative energy alignments about ET between poly(**1**) and silver ion.

**Figure S14.** Absorption spectra of poly(**1**) in DMF/ $\text{H}_2\text{O}$  (99:1 v/v) ([PRU] = 23.8  $\mu\text{M}$ ) upon the addition of various cations ([cation]/[PRU] = 2).

**Figure S15.** Fluorescence quenching ( $I/I_0$ ) by different cations at the maximum emission wavelength ( $I$ : fluorescence intensity upon addition of a cation;  $I_0$ : initial fluorescence intensity). [PRU] = 23.8  $\mu\text{M}$ , [cation]/[PRU] = 2. 1:  $\text{Mn}^{2+}$ , 2:  $\text{Na}^+$ , 3:  $\text{Pb}^{2+}$ , 4:  $\text{Cu}^{2+}$ , 5:  $\text{K}^+$ , 6:  $\text{Zn}^{2+}$ , 7:  $\text{Co}^{2+}$ , 8:  $\text{Ag}^+$ .

**Figure S16.** Stern-Volmer plots of poly(**1**) emission quenching by different cations in DMF/ $\text{H}_2\text{O}$  (99:1 v/v).

**Figure S17.**  $k_{\text{SV}}$  values for different cations. 1:  $\text{Co}^{2+}$ , 2:  $\text{Na}^+$ , 3:  $\text{Pb}^{2+}$ , 4:  $\text{K}^+$ , 5:  $\text{Mn}^{2+}$ , 6:  $\text{Zn}^{2+}$ , 7:  $\text{Cu}^{2+}$ , 8:  $\text{Ag}^+$ .

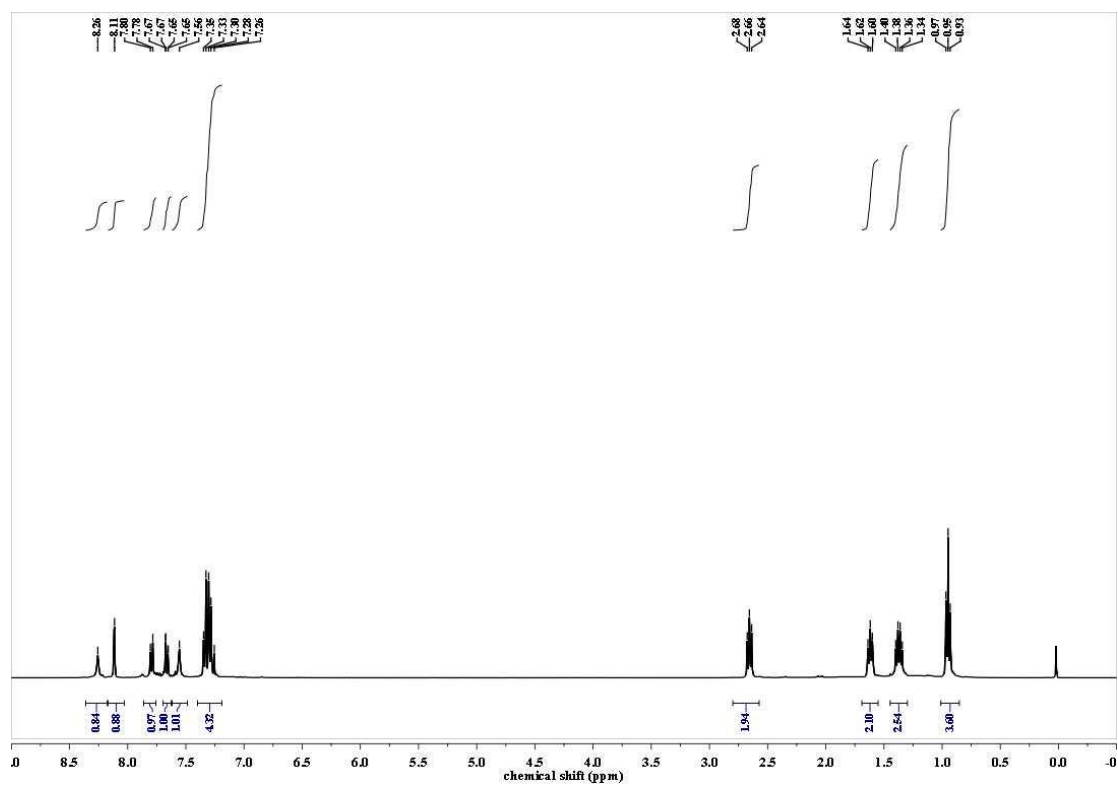

**Figure S1.**  $^1\text{H}$  NMR spectrum of **1** in  $\text{CDCl}_3$ .

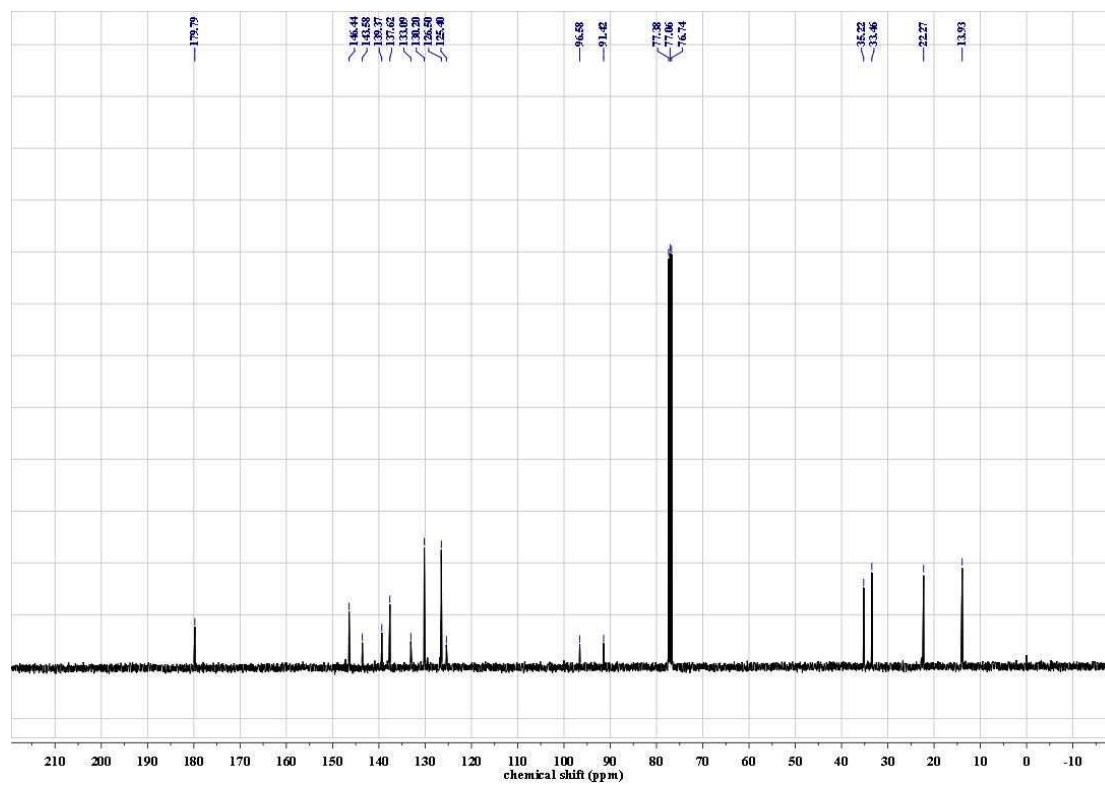

**Figure S2.**  $^{13}\text{C}$  NMR spectrum of **1** in  $\text{CDCl}_3$ .

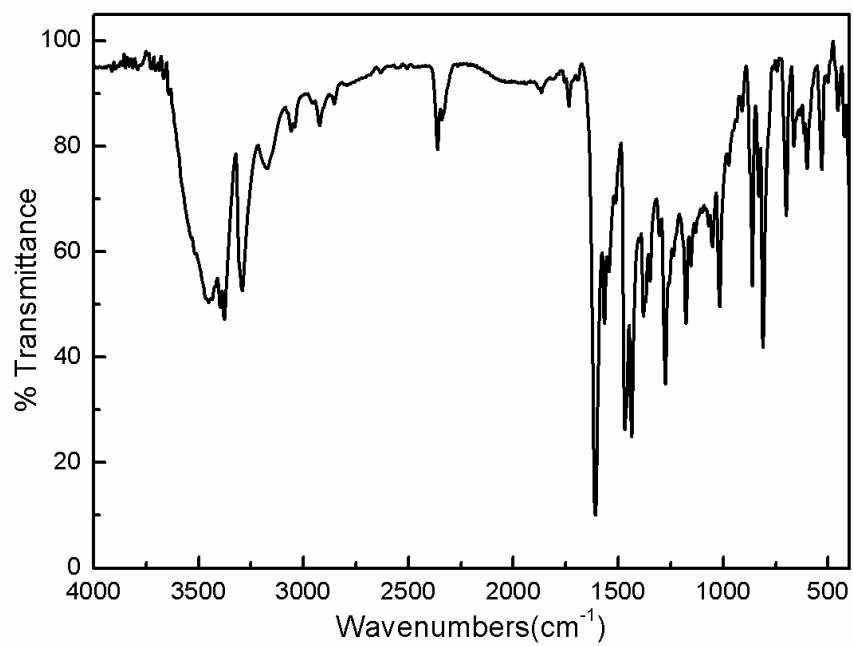

**Figure S3.** IR spectrum of **1**

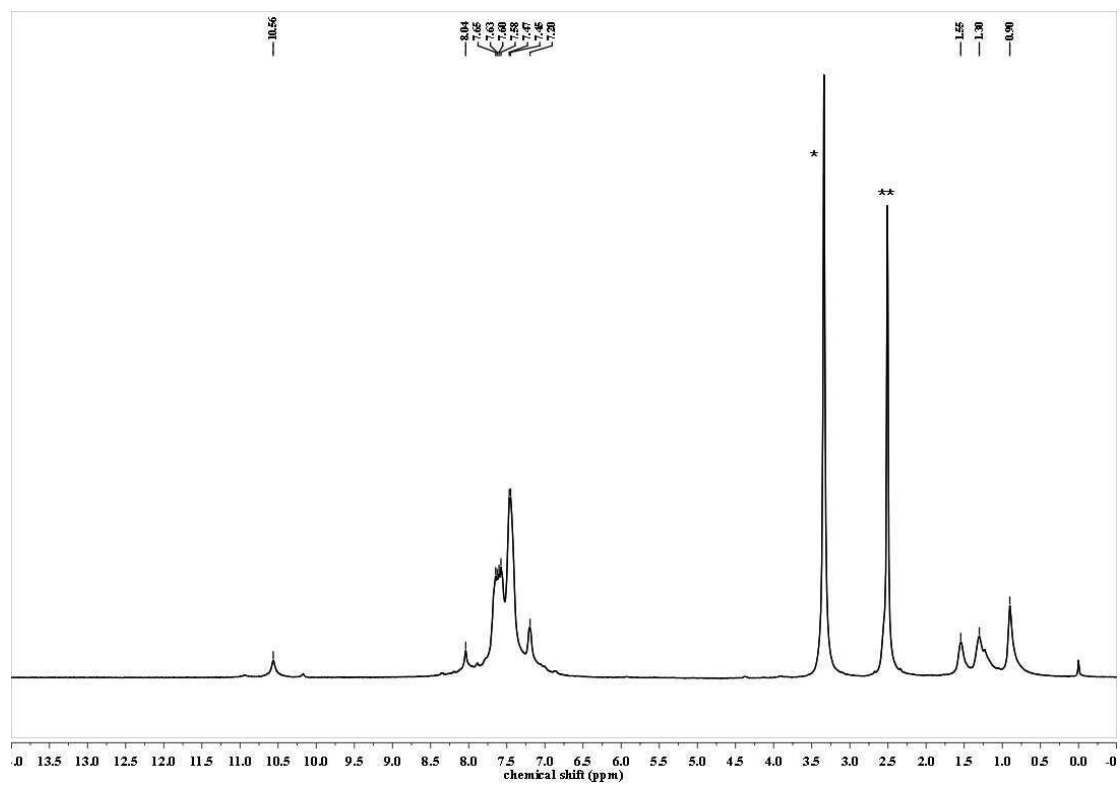

**Figure S4.** <sup>1</sup>H NMR spectrum of poly(1) in DMSO-d<sub>6</sub>. \* indicates H<sub>2</sub>O, \*\* indicates solvent.

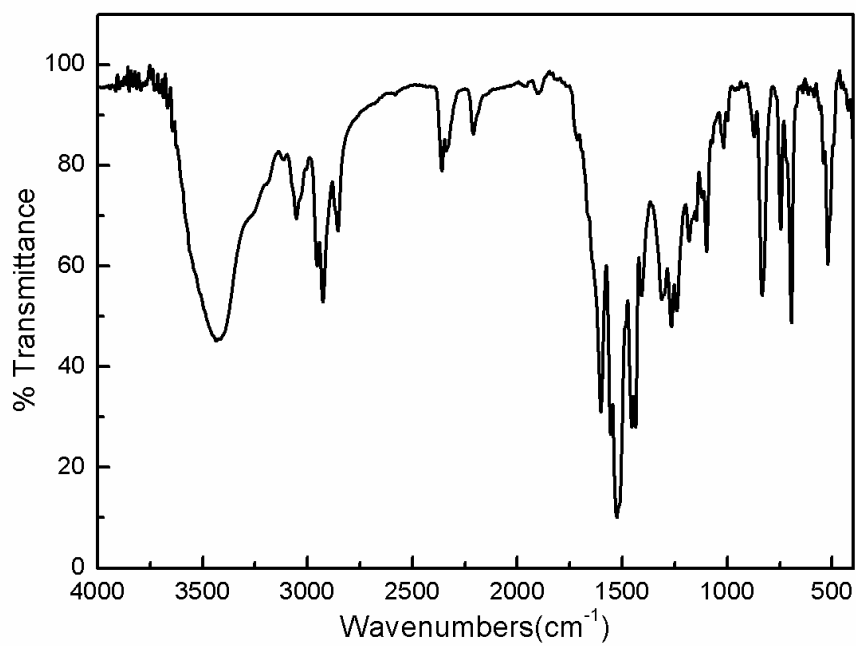

**Figure S5.** IR spectrum of poly(**1**).

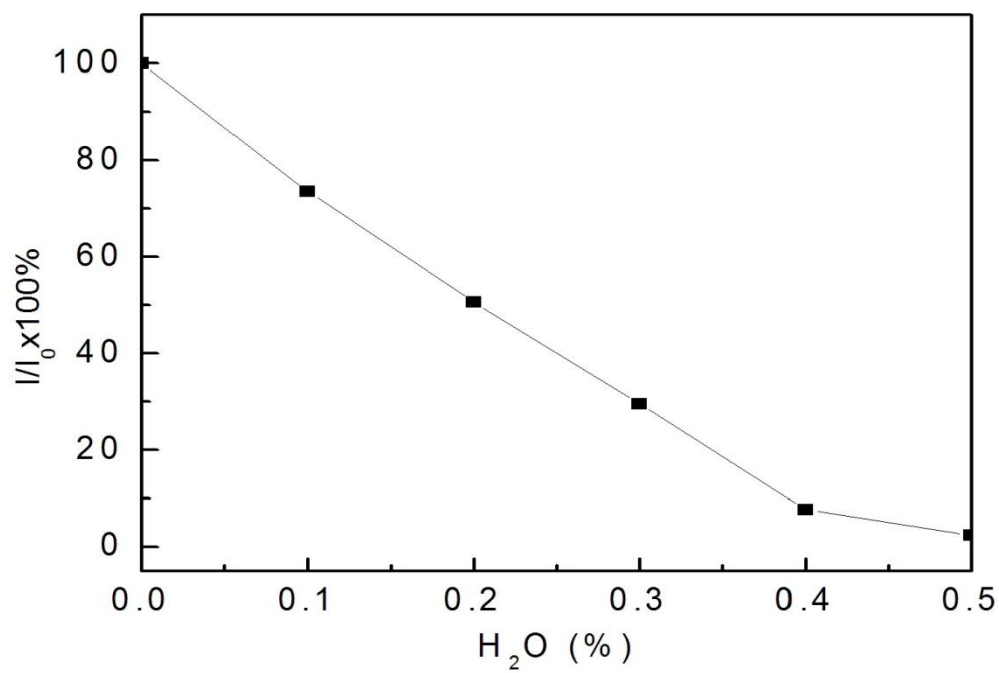

**Figure S6.** Relative intensity ( $I/I_0$ ) of fluorescence at 452 nm of poly(**1**) in DMF/water ( $[PRU] = 23.8\mu M$ ). Excitation at 380 nm.

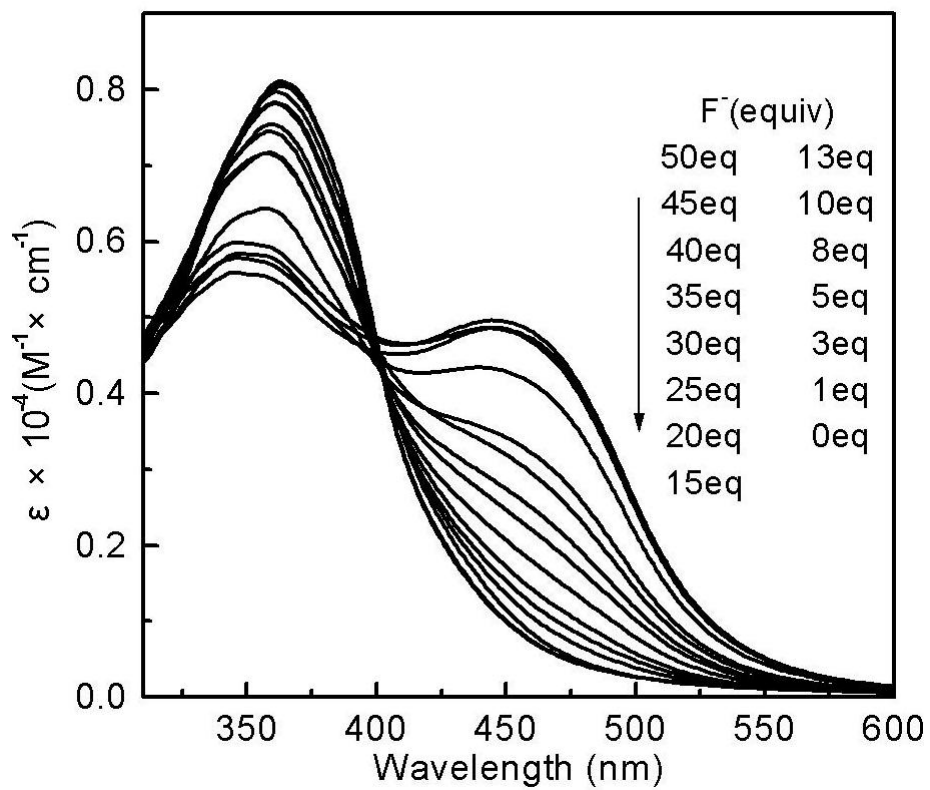

**Figure S7.** UV-vis spectra of poly(1) in DMF/H<sub>2</sub>O (99:1 v/v) ([PRU] = 23.8 μM) upon titration with F<sup>-</sup> (0–50 equivalents).



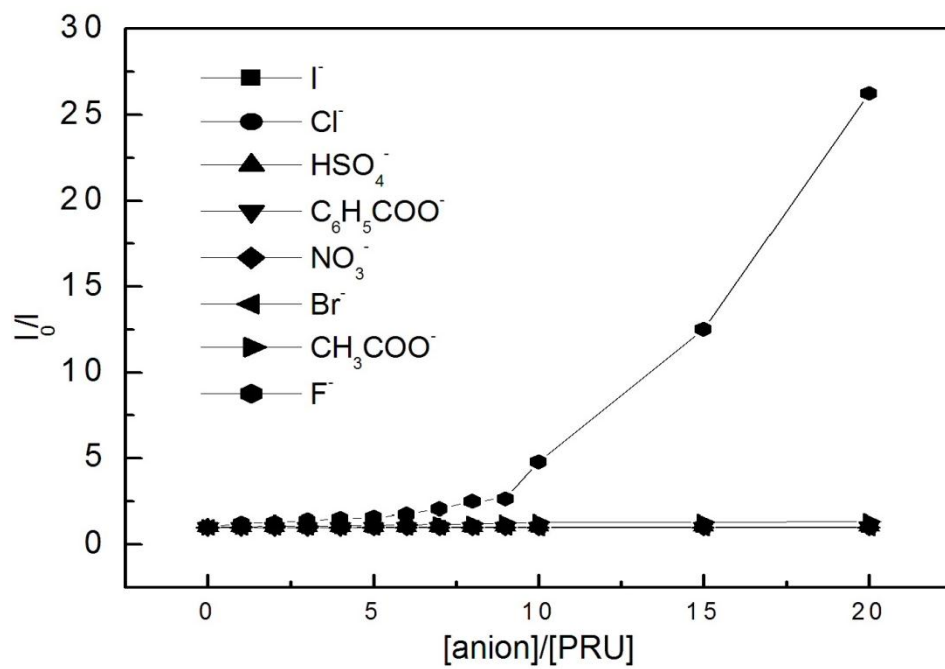

**Figure S8.** Stern-Volmer plots of poly(1) emission quenching by different anions in DMF.

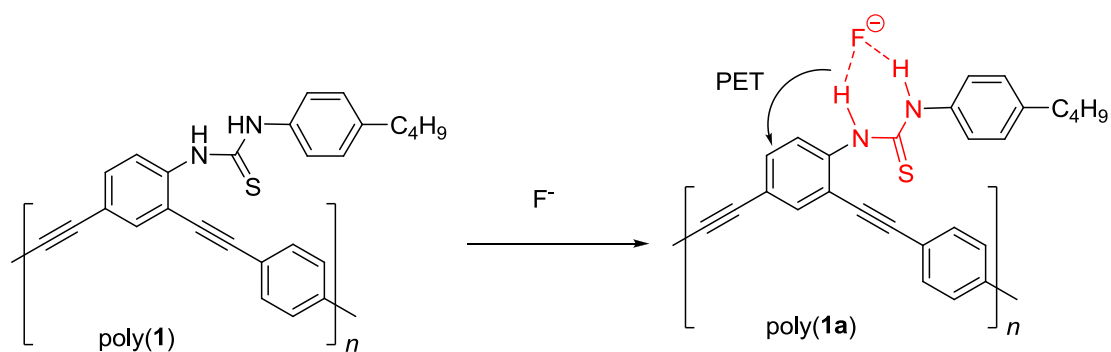

**Figure S9.** Schematic map of the interaction between poly(1) and fluoride ion.

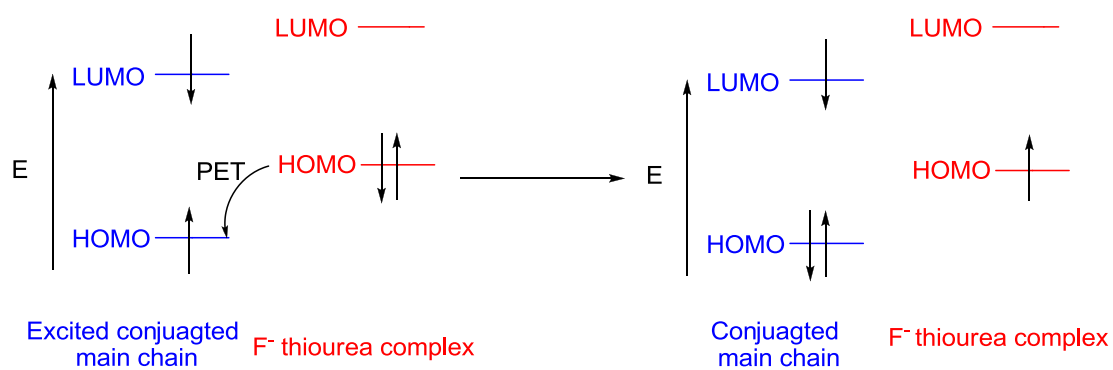

**Figure S10.** Relative energy alignments about PET between poly(1) and fluoride ion.

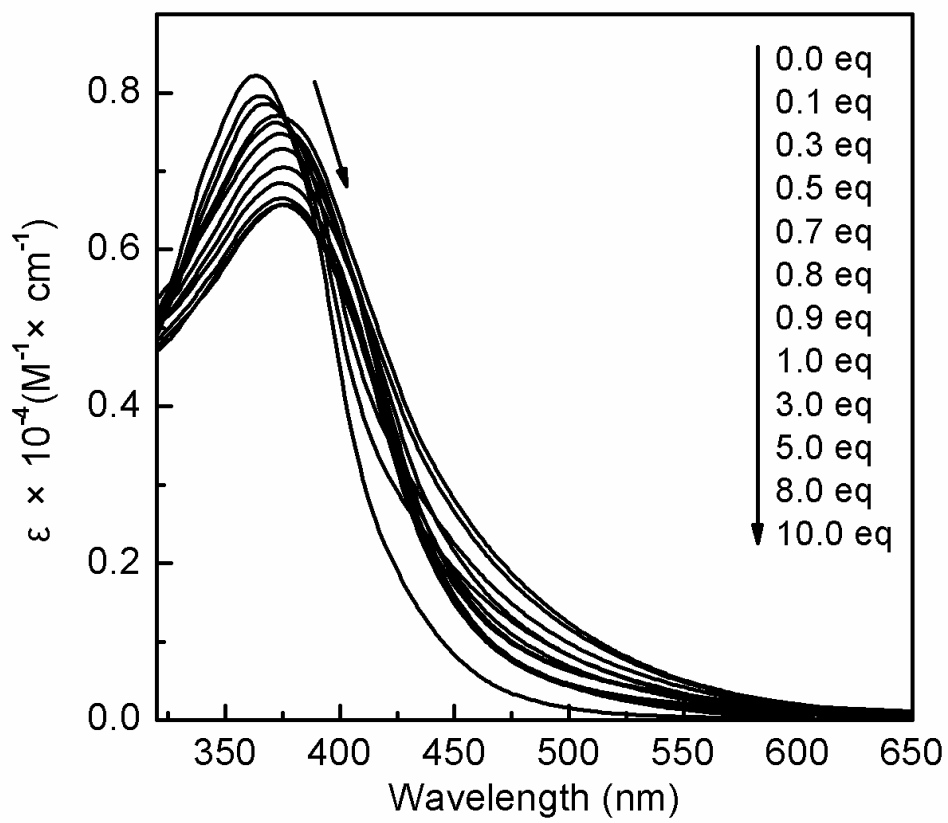

**Figure S11.** UV-vis spectra of poly(1) in DMF/H<sub>2</sub>O (99:1 v/v) ([PRU] = 23.8 μM) upon titration with Ag<sup>+</sup> (0–10 equivalents).

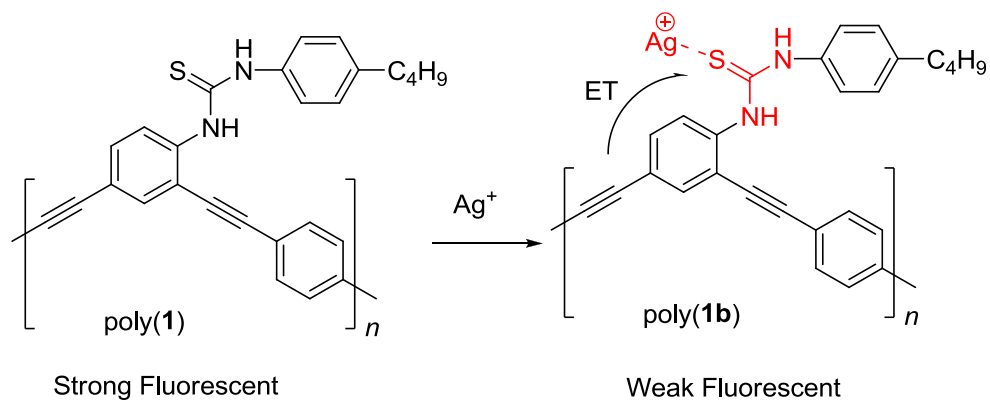

**Figure S12.** Schematic map of the interaction between poly(1) and silver ion.

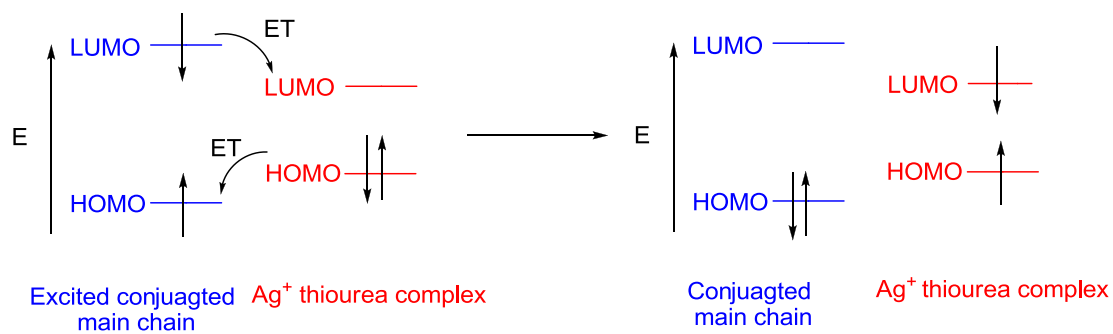

**Figure S13.** Relative energy alignments about ET between poly(1) and silver ion.

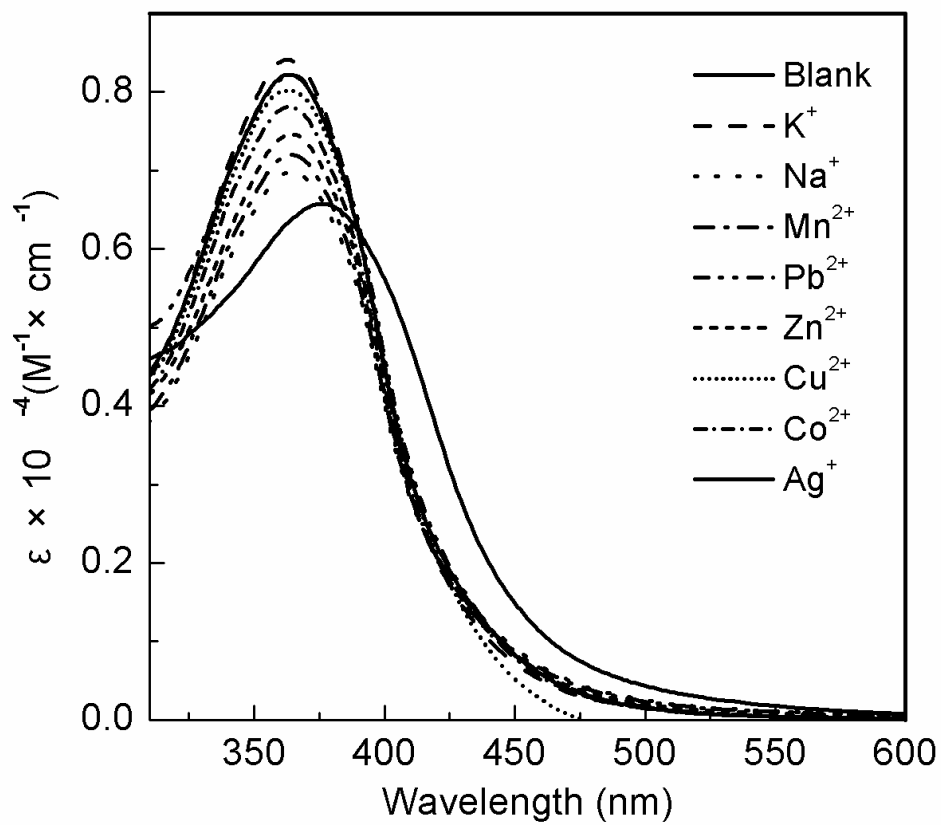

**Figure S14.** Absorption spectra of poly(1) in DMF/H<sub>2</sub>O (99:1 v/v) ([PRU] = 23.8 μM) upon the addition of various cations ([cation]/[PRU] = 2).

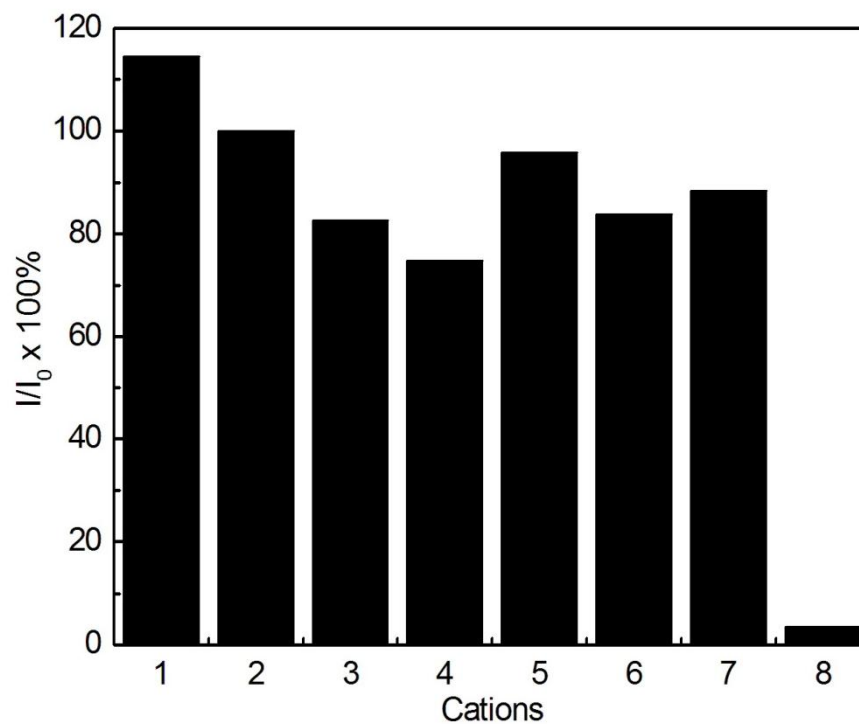

**Figure S15.** Fluorescence quenching ( $I/I_0$ ) by different cations at the maximum emission

wavelength ( $I$ : fluorescence intensity upon addition of a cation;  $I_0$ : initial fluorescence intensity).

[PRU] = 23.8  $\mu$ M, [cation]/[PRU] = 2. 1:  $Mn^{2+}$ , 2:  $Na^+$ , 3:  $Pb^{2+}$ , 4:  $Cu^{2+}$ , 5:  $K^+$ , 6:  $Zn^{2+}$ , 7:  $Co^{2+}$ , 8:

$Ag^+$ .

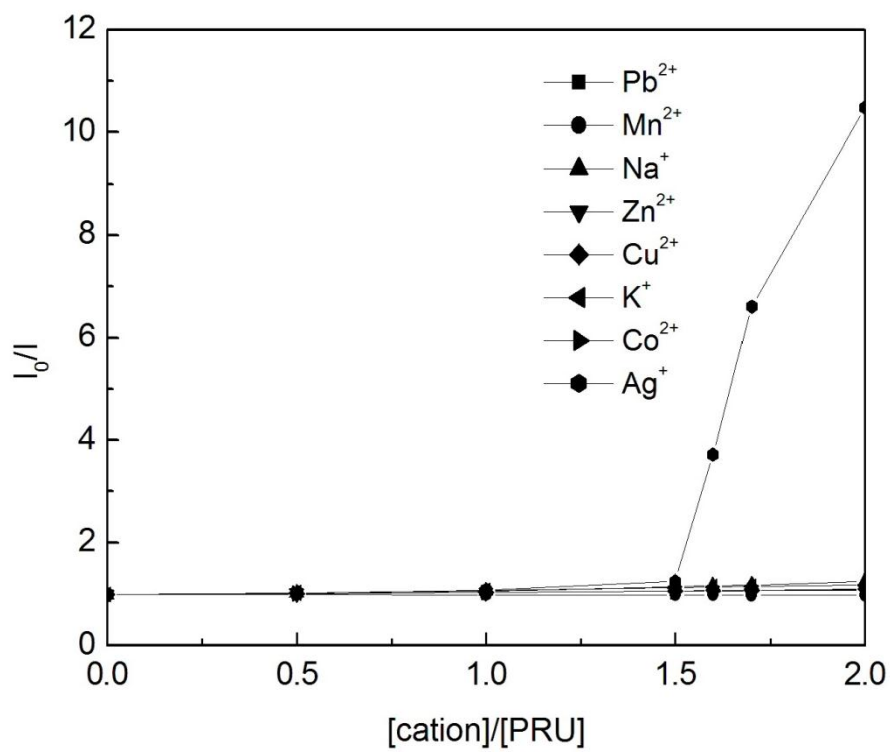

**Figure S16.** Stern-Volmer plots of poly(1) emission quenching by different cations in DMF/H<sub>2</sub>O

(99:1 v/v).

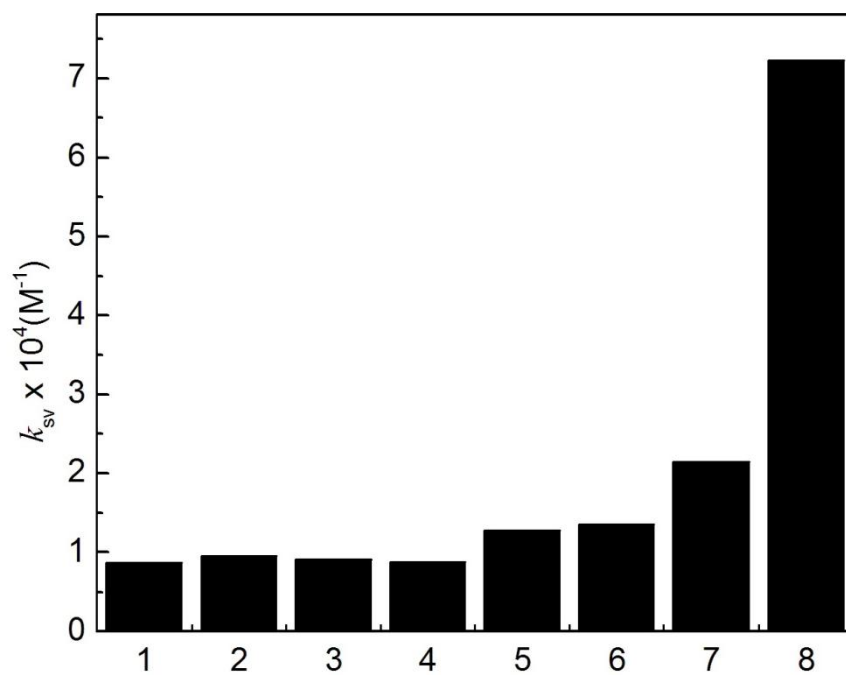

**Figure S17.**  $k_{sv}$  values for different cations. 1:  $Co^{2+}$ , 2:  $Na^+$ , 3:  $Pb^{2+}$ , 4:  $K^+$ , 5:  $Mn^{2+}$ , 6:  $Zn^{2+}$ , 7:

$Cu^{2+}$ , 8:  $Ag^+$ .
